# Supplementary material for: An iron-based micropore-enriched silica catalyst: in situ confining of Fe2O3 in the mesopores and its improved catalytic properties
Source: Royal Society of Chemistry journal article supplement (doi:10.1039/c6ra13146h), 2016-01-01
Supplement: c6ra13146h1.pdf [file c6ra13146h1.pdf]

Supplementary Materials for RSC Advances

## Iron-based micropore-enriched silica catalyst: In-situ confining

### Fe<sub>2</sub>O<sub>3</sub> in mesopore and its improved catalytic properties

Saifu Long,<sup>a</sup> Shijian Zhou,<sup>ab</sup> Fu Yang,<sup>a</sup> Kangchao Lu,<sup>a</sup> Tao Xi,<sup>a</sup> and Yan Kong<sup>\*a</sup>

<sup>a</sup> State Key Laboratory of Materials-Oriented Chemical Engineering, Nanjing Tech University, Nanjing

210009, China. <sup>b</sup> Jiangsu National Synergetic Innovation Center for Advanced Materials (SICAM)

Nanjing Tech University, Nanjing 210009, Jiangsu, China.

\*E-mail: kongy36@njtech.edu.cn (Yan Kong).

## Supplementary data

### Catalytic stability

Table S1 Recycling test for sample 0.15Fe/AMS and 0.15Fe/AMS(p)<sup>a</sup>

| Catalysts     | Recycle | Fe/Si <sup>b</sup><br>(wt%) | Product distribution   |                         |                        |
|---------------|---------|-----------------------------|------------------------|-------------------------|------------------------|
|               |         |                             | X(Ph) <sup>c</sup> / % | S(CAT) <sup>d</sup> / % | S(HQ) <sup>e</sup> / % |
| 0.15Fe/AMS    | 1       | 2.53                        | 44.3                   | 52.2                    | 28.4                   |
|               | 2       | 2.25                        | 40.1                   | 51.4                    | 27.9                   |
|               | 3       | 2.08                        | 38.7                   | 50.1                    | 27.7                   |
|               | 4       | 1.95                        | 37.9                   | 50.9                    | 27.8                   |
|               | 5       | 1.94                        | 37.7                   | 50.7                    | 27.9                   |
| 0.15Fe/AMS(p) | 1       | 2.50                        | 36.7                   | 31.4                    | 19.6                   |
|               | 2       | 1.41                        | 25.1                   | 33.2                    | 18.4                   |
|               | 3       | 0.98                        | 15.5                   | 34.6                    | 19.4                   |
|               | 4       | 0.56                        | 12.1                   | 34.1                    | 18.8                   |
|               | 5       | 0.54                        | 12.0                   | 34.4                    | 18.6                   |

<sup>a</sup> Reaction conditions: molar ratio, phenol/H<sub>2</sub>O<sub>2</sub> ≈ 2:1, time, 2 h, reaction temperature, room temperature. <sup>b</sup> Fe/Si mass ratios are determined by ICP-AES. <sup>c</sup> The conversion of phenol. <sup>d</sup> The selectivity of catechol. <sup>e</sup> The selectivity of hydroquinone.
